# Supplementary material
Source: PubMed Central journal article supplement (PMC4931883)
Supplement: supp_115.068254_Supplemental_68254.pdf [file supp_115.068254_Supplemental_68254.pdf]

Transcription factor-mediated regulation of kidney versus liver specification of SLC and ABC drug transporters, tight junction molecules and signature biomarkers. Martovetsky G, Bush KT, Nigam SK. *Drug Metabolism and Disposition*

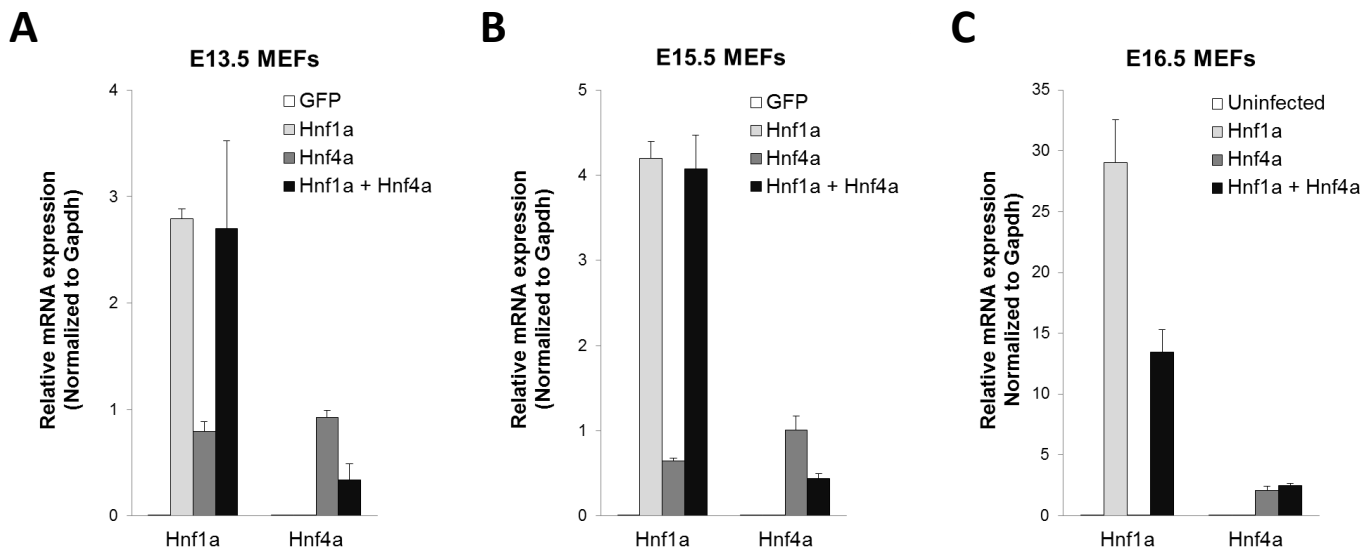

**Supplemental Figure 1. Levels of Hnf1a and Hnf4a expression in transduced MEFs.**

Lentiviral transduction led to high levels of exogenous Hnf1a and Hnf4a expression in all cases. However, in E13.5 (A) and E15.5 (B) MEFs, but not in E16.5 MEFs (C), Hnf4a overexpression induced the expression of endogenous Hnf1a. It is worth noting that E13.5 and E15.5 MEFs were prepared slightly differently than E16.5 MEFs (see Methods).

Transcription factor-mediated regulation of kidney versus liver specification of SLC and ABC drug transporters, tight junction molecules and signature biomarkers.  
 Martovetsky G, Bush KT, Nigam SK.  
*Drug Metabolism and Disposition*

| Supplemental Table 1<br>List of primers used for RT-q-PCR |                         |                         |
|-----------------------------------------------------------|-------------------------|-------------------------|
| Mouse Gene                                                | Forward Primer          | Reverse Primer          |
| Abcb1l                                                    | GAACAAGCTGTGGTTGGTG     | GACGAGCCCCAGTGATTACC    |
| Abcb1a                                                    | GATCCTCACCAAGCGACTCC    | GACCCCTGTAGCCCTTTCAC    |
| Abcb1b                                                    | GATCCTCACCAAGCGAGTCC    | GCCCATCGCCCTTAAACAC     |
| Abcb4                                                     | ACTAGGCAGCATCAGCAACC    | GGGTGCCAGGAACATAAAC     |
| Abcc1                                                     | CTGCTCACCCCTGTCTCTG     | TGCACCATCATCCCTGTAACTCC |
| Abcc2                                                     | CAAGCAGGTGTTCGTGTGTG    | TGGATCACCAACACCAGGAG    |
| Abcc3                                                     | TGTCTATGCCTTACAGGTGAC   | GGAACCTCCACCATTCCTCGC   |
| Abcc4                                                     | AGAGGCCATCGTCAGCATTCT   | ACTGTCTAGTGCCTTGTCCC    |
| Abcc5                                                     | GTGTCTGGGAGAGACACCCC    | AGCTGCCCTTCTCCGAC       |
| Abcc6                                                     | GTGCCTGGAAAGAAGTAGACCC  | TGAGGTTGATCCCCTGCAG     |
| Abeg2                                                     | AAACTTGCTCGGAACCCCTC    | CTCCAGCTCTATTTGCATTCC   |
| Alb                                                       | AGCGGAGCAACTGAAGACTG    | GGTTTGGACCCCTCAGTCGAG   |
| Apoa1                                                     | AGCTGAACCTGAATCTCCTGG   | GAAAGTCCCGAGTCATGGGC    |
| Cdh1                                                      | AACCCAAGCACGTATCAGGG    | ACTGCTGGTCAGGAATCGTTG   |
| Cdh16                                                     | TCGCTTCCACATCTGAGCC     | CAAGGCATGGTCTAGGCTG     |
| Cdh2                                                      | GCAGTCTTACCGAAGGATGTG   | CGTCCACCTTAAAATCTGCTG   |
| Cdh26                                                     | TCATCCCAAGTGACAGTGGC    | GATAGACCCGGGTGGAAGAC    |
| Cdh6                                                      | GAGATGGCTGATGTGGCAC     | TGAGCAACCGCTGTCTTGATG   |
| Cldn10                                                    | CCGACAACAACAAGACACCC    | TCCGCCTTGATACTTGGTCC    |
| Cldn12                                                    | AGCCGATGTGCTCCTGTTG     | GGAGGGCTTGAGCTGTATGG    |
| Cldn6                                                     | CAGTCTCTTTTGCAGGCTCG    | TCCCCAAGATTTGCAGACCAG   |
| Cldn8                                                     | GGAGGACGATGGCAACCTAC    | CAGACACTCTCACTGAGGC     |
| Cldn9                                                     | AAAGTACGTGAGCAGCCAGC    | AGCCTTCACCCATACAGCC     |
| Dsc2                                                      | GATCACTACCACTCGGCTC     | TGCACCTTGTCTGTTGTGTC    |
| Dsg2                                                      | GCACTCCTGCTCCTGCTC      | TGGCACCACTTGTCTCTC      |
| Dsp                                                       | AGACCTGCGTGAGAAGTCAG    | GAGAGGTGCGCTGGATGATG    |
| Fabp1                                                     | TGAAGGCAATAGGTCTGCCC    | GTGAACTCATTGCGGACCAC    |
| Gapdh                                                     | CTTTGGCATTGTGGAAGGGC    | TGCAGGGATGATGTTCTGGG    |
| Ggt1                                                      | CAGCACCACAGGAAAAGTTGAG  | ACGGATTTCAACAGGGACAG    |
| Hnf1a                                                     | AGAGCCCTTCATGGCAACC     | TGAAGACCTGCTGGTGGGTG    |
| Hnf4a                                                     | GGCTGCGATGAAGAAGGAAG    | GGAGAGGTGATCTGCTGGG     |
| Jam3                                                      | GAGCCAATCCCAGGTTCCAG    | CGTCTTGTGGACAGCATTG     |
| Kap                                                       | ATCATGGACTTACGCCAGC     | TGTGATGTCTGTGTCTCAGTG   |
| Ocln                                                      | AGAGTACATGGCTGCTGCTG    | CACCATCCTCTTGATGTGCG    |
| Pard3                                                     | CCACCAAGGAAATGAATGC     | TCCGGTGTGAGAACAACTGC    |
| Pard6b                                                    | TTTCCACCOCATCCACTG      | ATGTGAGGCTTCTCCGGTG     |
| Serpina1                                                  | GCAAGCTGAAAATGACTCCCTC  | TCTGGGAGTGTCTGTCTCC     |
| Slc22a1                                                   | GACCTGAAGATGATGTCCCTTG  | TGGTACAGCACACACAAGAG    |
| Slc22a12                                                  | ACGACCACAGCACCTTTCAG    | GCCCAAACCTATCTGAGGC     |
| Slc22a18                                                  | GCCTCCCTTCAAGACTCTTCT   | CTCAGCCTCCCAATGACCAG    |
| Slc22a2                                                   | ATTTCTGGTGCATACCCGAGTC  | GCCAGTATCCTCATCTCCCG    |
| Slc22a3                                                   | TGGCTAAGTGCAATGGAAAACAC | TCGTGAACCAAGCAACATAAGG  |
| Slc22a4                                                   | GCCAGCAGGGATATTCGATCC   | GGTGTAGCATCCACAGCATCAC  |
| Slc22a6                                                   | CTACTGCATTTTCCGGCTCC    | ATAGGCACGGGTGTGAATAGG   |
| Slc22a7                                                   | CCGGGCATCATAGCATCTG     | GTCTCTCACTTATGGGCCGC    |
| Slc34a1                                                   | TTGTGAGCATGGTCTCCTCC    | CAAAAAGCCCGCTGAAAGTC    |
| Slc47a1                                                   | GGCTGTAAAGATCTCGTGGG    | ACCACAGGTACAAGCAAGACC   |
| Slc51a                                                    | ACCCAGGTACACAGCAGAG     | GGTGGGGCTATGTCCACTG     |
| Slc51b                                                    | CAGGAACTGCTGGAAGAAATGC  | TCCGATTTCTGTTCGCCAGGATG |
| Slco1a1                                                   | TGGTTCCTTCTGAGGTGTGTCT  | CGCCAAAGTAAACAGGTGCC    |
| Slco1a6                                                   | ACCTCATTTCCTCATGGGCAG   | TTCACACACTCTGCTGGGTCT   |
| Slco2a1                                                   | TTGCAGAGCCTACCAACTCG    | AGGTTCACCTGTAGCCGTGTCT  |
| Slco2b1                                                   | CCAGCAAGGGTGGAGACC      | ACCAGCAAGAAGATGGGGTG    |
| Slco3a1                                                   | GGCCAAACCCCTTCTGTCT     | GGGGATGAAACCCCAACAACCG  |
| Tjp1                                                      | ACCCTCCTTACTCACCACAAG   | ATGAGGCTTCTGCTTCTGTGTG  |
| Tjp2                                                      | CCCCTTCTCCAGGGTCCAG     | GTGTCTCTGACTCCCGAC      |
| Tjp3                                                      | ACTGACCACAGAGATGCCAG    | TGGCTGCTTATCCCTCTCTG    |
| Trf                                                       | TGCTCCTCACTCAACCATTC    | CCGCAAGACCTCAAATATGG    |
| Ttr                                                       | CGCGGATGTGGTTTTCACAG    | GGTGTGTAGGAGTATGGGC     |
| Vim                                                       | TGCGAGAGAAATTCAGGAGG    | CCGTTCAAGGTCAAGACGTG    |

Transcription factor-mediated regulation of kidney versus liver specification of SLC and ABC drug transporters, tight junction molecules and signature biomarkers.  
 Martovetsky G, Bush KT, Nigam SK. *Drug Metabolism and Disposition*

| Supplemental Table 2<br>Microarray Datasets Used for Analysis |                  |                |              |       |                         |         |                                                               |                 |       |
|---------------------------------------------------------------|------------------|----------------|--------------|-------|-------------------------|---------|---------------------------------------------------------------|-----------------|-------|
| Study (PMID)                                                  | Accession Number | Array Platform | Mouse Strain | Sex   | Total Number of samples | Samples |                                                               |                 |       |
|                                                               |                  |                |              |       |                         | # Used  | Number                                                        | Tissue          | Age   |
| 19501082                                                      | GSE6290          | Mouse430_2     | CD1          | mixed | 37                      | 2       | GSM144594<br>GSM144595                                        | Proximal tubule | E15.5 |
|                                                               | GSE6589          | Mouse430_2     | CD1          | mixed | 11                      | 3       | GSM152247<br>GSM152248<br>GSM152249                           | Proximal tubule | E15.5 |
| 18349385                                                      | GSE10162         | Mouse430_2     | C57BL/6      | mixed | 6                       | 3       | GSM256959<br>GSM256960<br>GSM256961                           | Proximal tubule | Adult |
| 17468757                                                      | GSE7342          | Mouse430_2     | C57BL/6      | mixed | 12                      | 3       | GSM177040<br>GSM177041<br>GSM177042                           | Liver           | E15.5 |
| 19127519                                                      | GSE11899         | Mouse430_2     | C57BL/6      | mixed | 10                      | 5       | GSM300676<br>GSM300677<br>GSM300678<br>GSM300679<br>GSM300680 | Liver           | Adult |
| 18059474                                                      | GSE8969          | Mouse430_2     | C57BL/6      | mixed | 6                       | 3       | GSM227410<br>GSM227411<br>GSM227412                           | Liver           | Adult |
| 23064266                                                      | GSE32354         | Mouse430_2     | C57BL/6      | mixed | 35                      | 5       | GSM801178<br>GSM801179<br>GSM801180<br>GSM801181<br>GSM801182 | Liver           | Adult |

Transcription factor-mediated regulation of kidney versus liver specification of SLC and ABC drug transporters, tight junction molecules and signature biomarkers.  
Martovetsky G, Bush KT, Nigam SK. *Drug Metabolism and Disposition*

**Supplemental Table 3**  
**Expression of transporters and junction-related genes in transduced MEFs, isolated PTs and liver tissue**

| Gene Symbol       | Gene Name                                                                  | Category                  | Hnf1a + Hnf4a /Uninfected (Fold Change) | E15.5 PT (Normalized Expression) | Adult PT (Normalized Expression) | E15.5 Liver (Normalized Expression) | Adult Liver (Normalized Expression) |
|-------------------|----------------------------------------------------------------------------|---------------------------|-----------------------------------------|----------------------------------|----------------------------------|-------------------------------------|-------------------------------------|
| Cdh1              | Cadherin 1                                                                 | Junction (adherens)       | 23.3                                    | 9.4                              | 9.8                              | 9.0                                 | 9.5                                 |
| Cdh2              | Cadherin 2                                                                 | Junction (adherens)       | -2.1                                    | 6.1                              | 6.4                              | 8.5                                 | 10.0                                |
| Cdh6              | Cadherin 6                                                                 | Junction (adherens)       | 2.4                                     | 7.4                              | 6.4                              | 5.5                                 | 5.9                                 |
| Cdh16             | Cadherin 16                                                                | Junction (adherens)       | 5.0                                     | 11.8                             | 13.0                             | 5.3                                 | 6.0                                 |
| Cdh26             | Cadherin 26                                                                | Junction (adherens)       | 7.3                                     | 6.1                              | 6.4                              | 8.5                                 | 10.0                                |
| Dsc2              | Desmocollin 2                                                              | Junction (desmosome)      | 1.4                                     | 4.8                              | 4.6                              | 7.1                                 | 8.6                                 |
| Dsg2              | Desmoglein 2                                                               | Junction (desmosome)      | 1.4                                     | 6.7                              | 6.0                              | 7.0                                 | 9.1                                 |
| Dsp               | Desmoplakin                                                                | Junction (desmosome)      | 12.9                                    | 7.8                              | 6.2                              | 7.4                                 | 8.3                                 |
| Cldn6             | Claudin 6                                                                  | Junction (tight)          | 895.2                                   | 8.2                              | 5.3                              | 5.3                                 | 5.3                                 |
| Cldn8             | Claudin 8                                                                  | Junction (tight)          | 1.9                                     | 4.7                              | 9.2                              | 3.1                                 | 3.5                                 |
| Cldn9             | Claudin 9                                                                  | Junction (tight)          | 94.7                                    | 7.7                              | 3.3                              | 3.1                                 | 3.1                                 |
| Cldn10            | Claudin 10                                                                 | Junction (tight)          | 1.4                                     | 8.7                              | 9.8                              | 4.4                                 | 4.6                                 |
| Cldn12            | Claudin 12                                                                 | Junction (tight)          | 5.3                                     | 9.5                              | 9.1                              | 7.8                                 | 9.8                                 |
| Jam3              | Junctional adhesion molecule 3                                             | Junction (tight)          | -3.5                                    | 6.1                              | 7.2                              | 5.1                                 | 5.1                                 |
| Ocln              | Occludin                                                                   | Junction (tight)          | 21.9                                    | 8.7                              | 7.4                              | 7.1                                 | 7.7                                 |
| Tjp1              | Tight junction protein 1                                                   | Junction (tight)          | 6.1                                     | 9.8                              | 9.3                              | 9.0                                 | 9.2                                 |
| Tjp2              | Tight junction protein 2                                                   | Junction (tight)          | 115.9                                   | 8.7                              | 8.2                              | 7.6                                 | 7.5                                 |
| Tjp3              | Tight junction protein 3                                                   | Junction (tight)          | 10.2                                    | 6.7                              | 6.2                              | 5.3                                 | 7.4                                 |
| Pard6b            | Par-6 family cell polarity regulator beta                                  | Polarity                  | 3.1                                     | 8.5                              | 7.4                              | 5.8                                 | 6.1                                 |
| Pard3             | Par-3 family cell polarity regulator                                       | Polarity                  | 1.2                                     | 8.5                              | 7.4                              | 5.8                                 | 6.1                                 |
| Abcb11 (Bsep)     | ATP-binding cassette, sub-family B (MDR/TAP), member 11                    | Transporter (apical)      | 125.1                                   | 5.3                              | 4.7                              | 8.0                                 | 11.7                                |
| Abcb1a (Mdr1a)    | ATP-binding cassette, sub-family B (MDR/TAP), member 1A                    | Transporter (apical)      | 75.0                                    | 3.8                              | 4.6                              | 3.7                                 | 4.3                                 |
| Abcb1b (Mdr1b)    | ATP-binding cassette, sub-family B (MDR/TAP), member 1B                    | Transporter (apical)      | -1.1                                    | 3.8                              | 5.3                              | 4.2                                 | 3.9                                 |
| Abcb4 (Mdr2)      | ATP-binding cassette, sub-family B (MDR/TAP), member 4                     | Transporter (apical)      | -1.9                                    | 6.3                              | 6.2                              | 10.5                                | 11.1                                |
| Abcc2 (Mrp2)      | ATP-binding cassette, sub-family C (CFTR/MRP), member 2                    | Transporter (apical)      | 1192.1                                  | 7.8                              | 10.3                             | 7.8                                 | 10.1                                |
| Abcc4 (Mrp4)      | ATP-binding cassette, sub-family C (CFTR/MRP), member 4                    | Transporter (apical)      | 3.9                                     | 8.2                              | 9.4                              | 7.4                                 | 6.1                                 |
| Abcg2 (Bcrp1)     | ATP-binding cassette, sub-family G (WHITE), member 2                       | Transporter (apical)      | 10.5                                    | 11.1                             | 11.9                             | 11.6                                | 10.5                                |
| Slc22a4 (Oatn1)   | Solute carrier family 22 (organic cation/zwitterion transporter), member 4 | Transporter (apical)      | 8.2                                     | 5.1                              | 7.7                              | 8.4                                 | 4.9                                 |
| Slc22a12 (Urat1)  | Solute carrier family 22 (organic anion/cation transporter), member 12     | Transporter (apical)      | 576.1                                   | 8.6                              | 10.8                             | 6.3                                 | 6.8                                 |
| Slc22a18          | Solute carrier family 22 (organic anion transporter), member 18            | Transporter (apical)      | -1.5                                    | 7.6                              | 11.6                             | 7.7                                 | 10.0                                |
| Slc34a1           | Solute carrier family 34 (sodium phosphate), member 1                      | Transporter (apical)      | 1336.9                                  | 9.9                              | 13.3                             | 4.7                                 | 4.9                                 |
| Slc47a1           | Solute carrier family 47 (multidrug and toxin extrusion), member 1         | Transporter (apical)      | 194.7                                   | 12.8                             | 12.5                             | 9.2                                 | 11.0                                |
| Slco1a1 (Oatp1a1) | Solute carrier organic anion transporter family, member 1a1                | Transporter (apical)      | 6.4                                     | 5.8                              | 8.8                              | 4.9                                 | 11.7                                |
| Slco1a6 (Oatp1a6) | Solute carrier organic anion transporter family, member 1a6                | Transporter (apical)      | 346.8                                   | 10.1                             | 10.3                             | 3.2                                 | 3.4                                 |
| Slco2a1 (Oatp2a1) | Solute carrier organic anion transporter family, member 2a1                | Transporter (apical)      | 16.6                                    | 6.9                              | 6.7                              | 6.4                                 | 7.9                                 |
| Slco2b1 (Oatp2b1) | Solute carrier organic anion transporter family, member 2b1                | Transporter (apical)      | 1.3                                     | 6.6                              | 6.7                              | 5.4                                 | 10.3                                |
| Slco3a1 (Oatp3a1) | Solute carrier organic anion transporter family, member 3a1                | Transporter (apical)      | 2.6                                     | 7.8                              | 8.9                              | 5.4                                 | 5.8                                 |
| Abcc1 (Mrp1)      | ATP-binding cassette, sub-family C (CFTR/MRP), member 1                    | Transporter (basolateral) | -1.0                                    | 8.5                              | 7.3                              | 7.3                                 | 5.7                                 |
| Abcc3 (Mrp3)      | ATP-binding cassette, sub-family C (CFTR/MRP), member 3                    | Transporter (basolateral) | 4.8                                     | 7.3                              | 6.1                              | 7.8                                 | 11.2                                |
| Abcc5 (Mrp5)      | ATP-binding cassette, sub-family C (CFTR/MRP), member 5                    | Transporter (basolateral) | 3.6                                     | 6.9                              | 6.6                              | 6.7                                 | 6.1                                 |
| Abcc6 (Mrp6)      | ATP-binding cassette, sub-family C (CFTR/MRP), member 6                    | Transporter (basolateral) | 14.8                                    | 7.1                              | 6.7                              | 7.2                                 | 10.0                                |
| Slc22a2 (Oct2)    | Solute carrier family 22 (organic cation transporter), member 2            | Transporter (basolateral) | 4.3                                     | 10.4                             | 10.3                             | 4.7                                 | 5.2                                 |
| Slc22a3 (Oct3)    | Solute carrier family 22 (organic cation transporter), member 3            | Transporter (basolateral) | 13.0                                    | 6.4                              | 5.2                              | 6.0                                 | 6.5                                 |
| Slc22a6 (Oat1)    | Solute carrier family 22 (organic cation transporter), member 6            | Transporter (basolateral) | 3438.8                                  | 7.9                              | 8.9                              | 4.5                                 | 4.7                                 |
| Slc22a7 (Oat2)    | Solute carrier family 22 (organic anion transporter), member 7             | Transporter (basolateral) | 7.9                                     | 6.6                              | 7.8                              | 6.2                                 | 10.8                                |
| Slc51a (Osta)     | Solute carrier family 51, alpha subunit                                    | Transporter (basolateral) | 138.1                                   | 6.7                              | 8.4                              | 5.1                                 | 5.2                                 |
| Slc51b (Ostb)     | Solute carrier family 51, beta subunit                                     | Transporter (basolateral) | 715.8                                   | 7.9                              | 8.1                              | 5.7                                 | 6.0                                 |

\* Fourth column colored based on the fold-change of expression level in MEFs transduced with Hnf1a and Hnf4a compared with control MEFs. Final four columns show mRNA microarray expression levels in E15.5 and adult mouse proximal tubules followed by E15.5 and adult liver tissue.
